# Supplementary material for: Combined Use of Mycobacterium tuberculosis–Specific CD4 and CD8 T-Cell Responses Is a Powerful Diagnostic Tool of Active Tuberculosis
Source: PubMed Central journal article supplement — Clin Infect Dis. 2014 Oct 31;60(3):432–7. doi: 10.1093/cid/ciu795 (PMC4293395; doi:10.1093/cid/ciu795), 2014-10-31
Supplement: supp_ciu795_ciu795supp.pdf [file supp_ciu795_ciu795supp.pdf]

**Suppl. Fig. 1:** Sub-analysis of the distribution of SCORE results on the 141 LTBI subjects and the 53 TB patients based on their TB clinical localization (*i.e.* pulmonary (PTB) or extrapulmonary (ETB) TB).

**Suppl. Table 1.** Demographic and clinical description of the 53 TB patients included in this study.

# Supplemental Figure 1

**A**

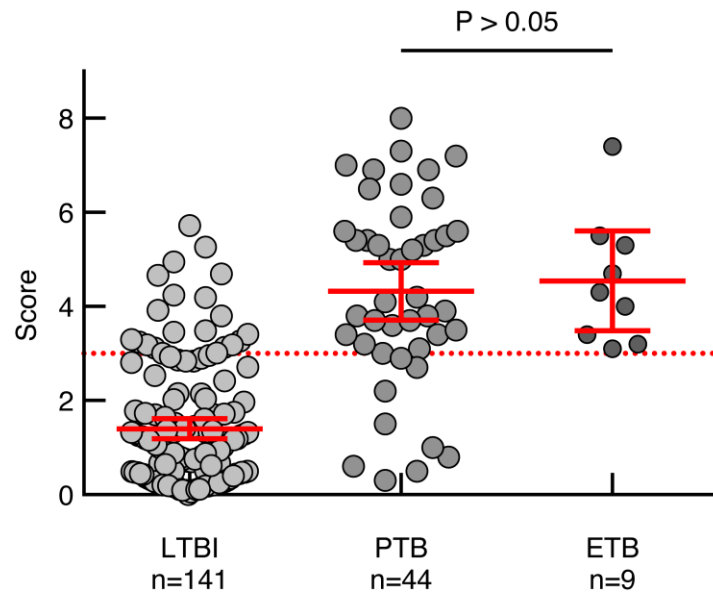

# Suppl. Table 1

## Demographics and laboratory/clinical measures of active TB patients

| Patient ID         | Gender | Age | TST <sup>a</sup> | IGRA <sup>b</sup> | PCR/Nucleic Acid Amplification | AFB <sup>c</sup> | Gene-Xpert | Culture | Clinics          | Origin      | Comments     |
|--------------------|--------|-----|------------------|-------------------|--------------------------------|------------------|------------|---------|------------------|-------------|--------------|
| A1 <sup>d</sup>    | F      | 30  | / <sup>e</sup>   | +                 | +                              | +                | /          | +       | PTB <sup>g</sup> | /           |              |
| A2 <sup>d</sup>    | F      | 59  | /                | +                 | +                              | +                | /          | -       | ETB              | /           |              |
| A3 <sup>d</sup>    | M      | 27  | /                | +                 | +                              | -                | /          | -       | ETB <sup>f</sup> | /           | Clinical TB  |
| A4 <sup>d</sup>    | F      | 78  | /                | +                 | +                              | +                | /          | +       | ETB              | /           |              |
| A5 <sup>d</sup>    | M      | 35  | /                | +                 | +                              | +                | /          | +       | ETB              | /           | HIV positive |
| A6 <sup>d</sup>    | F      | 8   | /                | +                 | +                              | +                | /          | +       | ETB              | /           |              |
| A7 <sup>d</sup>    | M      | 17  | /                | +                 | -                              | -                | /          | -       | ETB              | /           | Clinical TB  |
| A8 <sup>d</sup>    | F      | 48  | /                | +                 | +                              | +                | /          | +       | PTB              | /           | HIV positive |
| CH-3 <sup>d</sup>  | M      | 76  | /                | +                 | +                              | +                | /          | +       | PTB              | Switzerland |              |
| CH-4 <sup>d</sup>  | M      | 29  | +                | +                 | /                              | -                | /          | +       | PTB              | Somalia     |              |
| CH-5 <sup>d</sup>  | M      | 54  | /                | +                 | +                              | +                | /          | +       | PTB              | Somalia     |              |
| SA-1 <sup>d</sup>  | M      | 41  | /                | +                 | /                              | +                | /          | +       | PTB              | SA          |              |
| SA-2 <sup>d</sup>  | M      | 59  | /                | +                 | /                              | +                | /          | +       | PTB              | SA          |              |
| SA-3 <sup>d</sup>  | M      | 38  | /                | +                 | /                              | -                | /          | +       | PTB              | SA          |              |
| SA-4 <sup>d</sup>  | M      | 31  | /                | +                 | /                              | +                | /          | +       | PTB              | SA          |              |
| SA-5 <sup>d</sup>  | M      | 47  | /                | +                 | /                              | -                | /          | +       | PTB              | SA          |              |
| SA-7 <sup>d</sup>  | M      | 54  | /                | +                 | /                              | +                | /          | +       | PTB              | SA          |              |
| SA-8 <sup>d</sup>  | M      | 50  | /                | +                 | /                              | -                | /          | +       | PTB              | SA          |              |
| SA-9 <sup>d</sup>  | M      | 38  | /                | +                 | /                              | +                | /          | +       | PTB              | SA          |              |
| SA-10 <sup>d</sup> | M      | 51  | /                | +                 | /                              | -                | /          | +       | PTB              | SA          |              |
| SA-11 <sup>d</sup> | M      | 23  | /                | +                 | /                              | +                | /          | +       | PTB              | SA          |              |
| SA-12 <sup>d</sup> | M      | 45  | /                | +                 | /                              | -                | /          | +       | PTB              | SA          |              |
| TB-7 <sup>d</sup>  | F      | 31  | /                | +                 | -                              | -                | /          | +       | ETB              | Portugal    |              |
| TB-8 <sup>d</sup>  | M      | 18  | /                | +                 | +                              | -                | /          | +       | ETB              | na          |              |
| TB-14 <sup>d</sup> | M      | 37  | /                | +                 | /                              | -                | /          | +       | PTB              | SA          |              |
| TB-22 <sup>d</sup> | F      | 39  | /                | +                 | /                              | +                | /          | +       | PTB              | /           |              |
| TB-26 <sup>d</sup> | M      | 29  | +                | /                 | +                              | +                | /          | +       | PTB              | India       |              |
| TB-34 <sup>d</sup> | M      | 52  | +                | /                 | +                              | +                | /          | +       | PTB              | Romania     |              |
| TB-37              | F      | 35  | /                | +                 | /                              | /                | /          | /       | ETB              | Philippines | Clinical TB  |
| TB-38              | M      | 48  | /                | +                 | /                              | /                | /          | /       | ETB              | Italy       | Clinical TB  |
| TB-39              | F      | 25  | +                | +                 | /                              | /                | /          | -       | PTB              | Nigeria     | HIV positive |
| TB-40              | M      | /   | /                | +                 | /                              | /                | /          | +       | PTB              | SA          |              |
| TB-41              | M      | 43  | +                | +                 | /                              | +                | /          | +       | PTB              | Romania     |              |
| TB-42              | M      | 36  | /                | +                 | /                              | +                | /          | +       | PTB              | Romania     |              |
| TB-43              | F      | 26  | /                | +                 | /                              | +                | /          | +       | PTB              | Romania     |              |
| TB-44              | M      | 61  | +                | +                 | +                              | +                | /          | +       | PTB              | Italy       |              |
| TB-45              | F      | 51  | +                | +                 | -                              | -                | /          | -       | PTB              | Italy       | Clinical TB  |
| TB-46              | M      | 32  | /                | /                 | /                              | +                | +          | /       | PTB              | SA          |              |
| TB-47              | M      | 40  | /                | /                 | /                              | +                | +          | /       | PTB              | SA          |              |
| TB-48              | F      | 20  | /                | /                 | /                              | -                | +          | /       | PTB              | SA          |              |
| TB-49              | F      | 27  | /                | /                 | /                              | +                | +          | /       | PTB              | SA          |              |
| TB-50              | M      | 53  | /                | /                 | /                              | +                | +          | /       | PTB              | SA          |              |
| TB-51              | M      | 22  | /                | /                 | /                              | +                | +          | /       | PTB              | SA          |              |
| TB-52              | F      | 46  | /                | /                 | /                              | +                | +          | /       | PTB              | SA          |              |
| TB-53              | F      | 20  | /                | /                 | /                              | +                | +          | /       | PTB              | SA          |              |
| TB-54              | F      | 33  | /                | /                 | /                              | +                | +          | /       | PTB              | SA          |              |
| TB-55              | M      | 45  | /                | /                 | /                              | +                | +          | /       | PTB              | SA          |              |
| TB-56              | F      | 21  | /                | /                 | /                              | -                | +          | /       | PTB              | SA          |              |
| TB-57              | F      | 54  | /                | /                 | /                              | -                | +          | /       | PTB              | SA          |              |
| TB-58              | M      | 27  | /                | /                 | /                              | +                | +          | /       | PTB              | SA          |              |
| TB-59              | M      | 36  | /                | /                 | /                              | +                | +          | /       | PTB              | SA          |              |
| TB-60              | M      | 44  | /                | /                 | /                              | -                | +          | /       | PTB              | SA          |              |
| TB-61              | M      | 34  | /                | /                 | /                              | -                | +          | /       | PTB              | SA          |              |

<sup>a</sup> Tuberculin Skin test. <sup>b</sup> IFN- $\gamma$  Release Assay (IFN- $\gamma$  ELISpot or Quantiferon). <sup>c</sup> AFB (acid-fast bacilli) and culture performed according to Murray *et al*, Manual of Clinical Microbiology, American Society of Microbiology. <sup>d</sup> Previously described patients (Harari *et al*, Nat Med 2011; Rozot *et al*, Eur J Immunol 2013). <sup>e</sup> Not done/Missing data. <sup>f</sup> Extrapulmonary TB and <sup>g</sup> Pulmonary TB (according to WHO guidelines ([www.who.int](http://www.who.int))).
